# Supplementary material
Source: Springer Nature journal article supplement (https://www.springermedizin.de/resource/supplementary/12879_2012_2020_MOESM1_ESM.pdf/9443508)
Supplement: MOESM1 [file 9443508]

10 20 30 40 50

HHV-8 NC\_003409 GTCTGTGGGGTGGTGATGTTCTGAGTACATAGCGGTATTCGCGAGATGGG  
 ORF73 C-3 CA..AGT.AT.....  
 HHV8\_73\_01.1 -----  
 HHV8\_73\_02.1 -----  
 HHV8\_73\_Pb1 -----

60 70 80 90 100

HHV-8 NC\_003409 CCAGGTTGTGGGTCATCGTCTGGTGTATTATCTCCTGGTGGGCTACTGGC  
 ORF73 C-3 .....  
 HHV8\_73\_01.1 -----  
 HHV8\_73\_02.1 -----  
 HHV8\_73\_Pb1 -----

110 120 130 140 150

HHV-8 NC\_003409 AATTTGTTTCATGTGTGCTAACCAACAGGGTAATCCACTTCCATTTTCGTCCCT  
 ORF73 C-3 .....  
 HHV8\_73\_01.1 -----  
 HHV8\_73\_02.1 -----  
 HHV8\_73\_Pb1 -----

160 170

HHV-8 NC\_003409 CGGATGACGACCCGTGCAAGA  
 ORF73 C-3 ...ATCGA.TT.CC..GGCC  
 HHV8\_73\_01.1 -----  
 HHV8\_73\_02.1 -----  
 HHV8\_73\_Pb1 -----
